# Supplementary material
Source: MDPI journal article supplement (https://www.mdpi.com/2304-6740/8/5/37)
Supplement: s1 [file s1]

## checkCIF (basic structural check) running

---

Checking for embedded fcf data in CIF ...

Found embedded fcf data in CIF. Extracting fcf data from uploaded CIF, please wait . . . . .

## checkCIF/PLATON (basic structural check)

---

Structure factors have been supplied for datablock(s) L1'CuCatBr4, L1'CuCatCl4, L1HCuCatCl4

THIS REPORT IS FOR GUIDANCE ONLY. IF USED AS PART OF A REVIEW PROCEDURE FOR PUBLICATION, IT SHOULD NOT REPLACE THE EXPERTISE OF AN EXPERIENCED CRYSTALLOGRAPHIC REFEREE.

No syntax errors found.

Please wait while processing ....

[CIF dictionary](#)

[Interpreting this report](#)

[Structure factor report](#)

## Datablock: L1'CuCatCl4

---

|                 |                                               |                          |
|-----------------|-----------------------------------------------|--------------------------|
| Bond precision: | C-C = 0.0035 Å                                | Wavelength=0.71070       |
| Cell:           | a=19.7412(11)    b=15.9152(8)    c=29.6372(2) |                          |
|                 | alpha=90    beta=103.9780(9)    gamma=90      |                          |
| Temperature:    | 202 K                                         |                          |
|                 | Calculated                                    | Reported                 |
| Volume          | 9035.8(7)                                     | 9035.8(7)                |
| Space group     | C 2/c                                         | C 1 2/c 1                |
| Hall group      | -C 2yc                                        | -C 2yc                   |
| Moiety formula  | 2(C34 H46 Cl4 Cu N6 O2), 5(C2 H3 N)           | C39 H53.5 Cl4 Cu N8.5 O2 |
| Sum formula     | C78 H107 Cl8 Cu2 N17 O4                       | C39 H53.5 Cl4 Cu N8.5 O2 |
| Mr              | 1757.51                                       | 878.77                   |
| Dx,g cm-3       | 1.292                                         | 1.292                    |
| Z               | 4                                             | 8                        |
| Mu (mm-1)       | 0.762                                         | 0.762                    |

```

F000          3680.0          3680.0
F000'         3688.21
h,k,lmax      25,20,38          25,20,38
Nref          10379          10131
Tmin,Tmax     0.760,0.859      0.547,0.859
Tmin'         0.710
Correction method= # Reported T Limits: Tmin=0.547 Tmax=0.859
AbsCorr = MULTI-SCAN
Data completeness= 0.976          Theta(max)= 27.481
R(reflections)= 0.0476( 9623)      wR2(reflections)= 0.1187( 10131)
S = 1.139          Npar= 504

```

The following ALERTS were generated. Each ALERT has the format

**test-name\_ALERT\_alert-type\_alert-level.**

Click on the hyperlinks for more details of the test.

### 🟡 Alert level B

PLAT910\_ALERT\_3\_B Missing # of FCF Reflection(s) Below Theta(Min). 15 Note

**Author Response: Reduction of beam stop mask did not yield significant improvement. Most of those missing strong reflections appeared to be very strong and were treated as overflows. This is why it was old setting for the data collections.**

### 🟡 Alert level C

PLAT041\_ALERT\_1\_C Calc. and Reported SumFormula Strings Differ Please Check  
 PLAT220\_ALERT\_2\_C NonSolvent Resd 1 C Ueq(max) / Ueq(min) Range 3.1 Ratio  
 PLAT242\_ALERT\_2\_C Low 'MainMol' Ueq as Compared to Neighbors of C17 Check  
 PLAT244\_ALERT\_4\_C Low 'Solvent' Ueq as Compared to Neighbors of C53 Check  
 PLAT906\_ALERT\_3\_C Large K Value in the Analysis of Variance ..... 5.797 Check  
 PLAT911\_ALERT\_3\_C Missing FCF Refl Between Thmin & STh/L= 0.600 193 Report  
 PLAT934\_ALERT\_3\_C Number of (Iobs-Icalc)/Sigma(W) > 10 Outliers .. 1 Check

### 🟡 Alert level G

CHEMS02\_ALERT\_1\_G Please check that you have entered the correct

\_publ\_requested\_category classification of your compound;

FI or CI or EI for inorganic; FM or CM or EM for metal-organic;

FO or CO or EO for organic.

From the CIF: \_publ\_requested\_category CHOOSE FI FM FO CI CM CO or A

From the CIF: \_chemical\_formula\_sum : C39 H53.5 Cl4 Cu1 N8.5 O2

PLAT042\_ALERT\_1\_G Calc. and Reported MoietyFormula Strings Differ Please Check

PLAT045\_ALERT\_1\_G Calculated and Reported Z Differ by a Factor ... 0.50 Check

PLAT083\_ALERT\_2\_G SHELXL Second Parameter in WGHT Unusually Large 11.85 Why ?  
 PLAT143\_ALERT\_4\_G s.u. on c - Axis Small or Missing ..... 0.00020 Ang.  
 PLAT300\_ALERT\_4\_G Atom Site Occupancy of C55 Constrained at 0.5 Check

#### And 4 other PLAT300 Alerts

More ...

PLAT302\_ALERT\_4\_G Anion/Solvent/Minor-Residue Disorder (Resd 2 ) 67% Note

PLAT413\_ALERT\_2\_G Short Inter XH3 .. XHn H52A ..H56B . 1.81 Ang.  
 $1/2+x, -1/2+y, z = 3\_545$  Check

PLAT794\_ALERT\_5\_G Tentative Bond Valency for Cu1 (II) . 2.18 Info

PLAT912\_ALERT\_4\_G Missing # of FCF Reflections Above STh/L= 0.600 42 Note

PLAT933\_ALERT\_2\_G Number of OMIT Records in Embedded .res File ... 31 Note

PLAT941\_ALERT\_3\_G Average HKL Measurement Multiplicity ..... 3.0 Low

PLAT961\_ALERT\_5\_G Dataset Contains no Negative Intensities ..... Please Check

PLAT978\_ALERT\_2\_G Number C-C Bonds with Positive Residual Density. 6 Info

PLAT992\_ALERT\_5\_G Repd & Actual \_reflns\_number\_gt Values Differ by 1 Check

0 **ALERT level A** = Most likely a serious problem - resolve or explain

1 **ALERT level B** = A potentially serious problem, consider carefully

7 **ALERT level C** = Check. Ensure it is not caused by an omission or oversight

19 **ALERT level G** = General information/check it is not something unexpected

4 ALERT type 1 CIF construction/syntax error, inconsistent or missing data

6 ALERT type 2 Indicator that the structure model may be wrong or deficient

5 ALERT type 3 Indicator that the structure quality may be low

9 ALERT type 4 Improvement, methodology, query or suggestion

3 ALERT type 5 Informative message, check

## Datablock: L1'CuCatBr4

Bond precision: C-C = 0.0061 Å Wavelength=0.71069

Cell: a=19.8335(7) b=16.3023(5) c=29.7487(10)

alpha=90 beta=107.918(3) gamma=90

Temperature: 204 K

|                | Calculated                          | Reported                 |
|----------------|-------------------------------------|--------------------------|
| Volume         | 9152.2(5)                           | 9152.2(5)                |
| Space group    | C 2/c                               | C 1 2/c 1                |
| Hall group     | -C 2yc                              | -C 2yc                   |
| Moiety formula | 2(C34 H46 Br4 Cu N6 O2), 5(C2 H3 N) | C39 H53.5 Br4 Cu N8.5 O2 |
| Sum formula    | C78 H107 Br8 Cu2 N17 O4             | C39 H53.5 Br4 Cu N8.5 O2 |
| Mr             | 2113.11                             | 1056.57                  |
| Dx, g cm-3     | 1.534                               | 1.533                    |

|                        |             |             |
|------------------------|-------------|-------------|
| Z                      | 4           | 8           |
| Mu (mm <sup>-1</sup> ) | 4.012       | 4.022       |
| F000                   | 4256.0      | 4256.0      |
| F000'                  | 4250.86     |             |
| h,k,lmax               | 25,21,38    | 25,21,38    |
| Nref                   | 10518       | 10344       |
| Tmin,Tmax              | 0.396,0.547 | 1.000,1.000 |
| Tmin'                  | 0.192       |             |

Correction method= # Reported T Limits: Tmin=1.000 Tmax=1.000  
 AbsCorr = REFDELTA  
 Data completeness= 0.983                      Theta(max)= 27.482  
 R(reflections)= 0.0581( 8636)                      wR2(reflections)= 0.1118( 10344)  
 S = 1.145                      Npar= 504

The following ALERTS were generated. Each ALERT has the format

**test-name\_ALERT\_alert-type\_alert-level.**

Click on the hyperlinks for more details of the test.

## ● Alert level B

PLAT213\_ALERT\_2\_B Atom C21                      has ADP max/min Ratio .....                      4.2 prolata

**Author Response:** These alerts are generated because there is a large amount of disorder in the structure.

PLAT220\_ALERT\_2\_B NonSolvent Resd 1 C                      Ueq(max) / Ueq(min) Range                      8.9 Ratio

**Author Response:** These alerts are generated because there is a large amount of disorder in the structure.

PLAT242\_ALERT\_2\_B Low 'MainMol' Ueq as Compared to Neighbors of                      C23 Check

**Author Response:** These alerts are generated because there is a large amount of disorder in the structure.

PLAT910\_ALERT\_3\_B Missing # of FCF Reflection(s) Below Theta(Min).                      15 Note

**Author Response:** Reduction of beam stop mask did not yield significant improvement. Most of those missing strong reflections appeared to be very strong and were treated as overflows. This is why it was old setting for the data collections.

## ● Alert level C

PLAT041\_ALERT\_1\_C Calc. and Reported SumFormula Strings Differ Please Check  
 PLAT213\_ALERT\_2\_C Atom C22 has ADP max/min Ratio ..... 3.6 prolatt

**Author Response: These alerts are generated because there is a large amount of disorder in the structure.**

PLAT222\_ALERT\_3\_C NonSolvent Resd 1 H Uiso(max)/Uiso(min) Range 8.9 Ratio  
 PLAT234\_ALERT\_4\_C Large Hirshfeld Difference C22 --C23 . 0.20 Ang.  
 PLAT242\_ALERT\_2\_C Low 'MainMol' Ueq as Compared to Neighbors of C27 Check

**Author Response: These alerts are generated because there is a large amount of disorder in the structure.**

PLAT244\_ALERT\_4\_C Low 'Solvent' Ueq as Compared to Neighbors of C51 Check  
 PLAT244\_ALERT\_4\_C Low 'Solvent' Ueq as Compared to Neighbors of C53 Check  
 PLAT341\_ALERT\_3\_C Low Bond Precision on C-C Bonds ..... 0.00609 Ang.  
 PLAT360\_ALERT\_2\_C Short C(sp3)-C(sp3) Bond C21 - C23 . 1.39 Ang.  
 PLAT413\_ALERT\_2\_C Short Inter XH3 .. XHn H22A ..H22A . 2.10 Ang.  
                   2-x,y,3/2-z = 2\_756 Check  
 PLAT906\_ALERT\_3\_C Large K Value in the Analysis of Variance ..... 13.181 Check  
 PLAT906\_ALERT\_3\_C Large K Value in the Analysis of Variance ..... 3.059 Check  
 PLAT911\_ALERT\_3\_C Missing FCF Refl Between Thmin & STh/L= 0.600 156 Report  
 PLAT913\_ALERT\_3\_C Missing # of Very Strong Reflections in FCF .... 49 Note

## Alert level G

CHEMS02\_ALERT\_1\_G Please check that you have entered the correct  
   \_publ\_requested\_category classification of your compound;  
   FI or CI or EI for inorganic; FM or CM or EM for metal-organic;  
   FO or CO or EO for organic.  
   From the CIF: \_publ\_requested\_category CHOOSE FI FM FO CI CM CO or A  
   From the CIF: \_chemical\_formula\_sum : C39 H53.5 Br4 Cu1 N8.5 O2  
 PLAT019\_ALERT\_1\_G \_diffn\_measured\_fraction\_theta\_full/\*\_max < 1.0 0.996 Report  
 PLAT042\_ALERT\_1\_G Calc. and Reported MoietyFormula Strings Differ Please Check  
 PLAT045\_ALERT\_1\_G Calculated and Reported Z Differ by a Factor ... 0.50 Check  
 PLAT083\_ALERT\_2\_G SHELXL Second Parameter in WGHT Unusually Large 27.33 Why ?  
 PLAT300\_ALERT\_4\_G Atom Site Occupancy of C55 Constrained at 0.5 Check

### And 4 other PLAT300 Alerts

More ...

PLAT302\_ALERT\_4\_G Anion/Solvent/Minor-Residue Disorder (Resd 2 ) 67% Note  
 PLAT794\_ALERT\_5\_G Tentative Bond Valency for Cu1 (II) . 2.20 Info  
 PLAT912\_ALERT\_4\_G Missing # of FCF Reflections Above STh/L= 0.600 3 Note  
 PLAT941\_ALERT\_3\_G Average HKL Measurement Multiplicity ..... 3.5 Low  
 PLAT978\_ALERT\_2\_G Number C-C Bonds with Positive Residual Density. 3 Info

0 **ALERT level A** = Most likely a serious problem - resolve or explain

4 **ALERT level B** = A potentially serious problem, consider carefully

14 **ALERT level C** = Check. Ensure it is not caused by an omission or oversight

15 **ALERT level G** = General information/check it is not something unexpected

5 ALERT type 1 CIF construction/syntax error, inconsistent or missing data

9 ALERT type 2 Indicator that the structure model may be wrong or deficient

8 ALERT type 3 Indicator that the structure quality may be low

10 ALERT type 4 Improvement, methodology, query or suggestion

1 ALERT type 5 Informative message, check

---

## Datablock: L1HCuCatCl4

---

|                 |                |                    |
|-----------------|----------------|--------------------|
| Bond precision: | C-C = 0.0120 Å | Wavelength=0.71069 |
| Cell:           | a=15.405(7)    | b=13.137(6)        |
|                 | alpha=90       | beta=101.852(6)    |
|                 |                | gamma=90           |
| Temperature:    | 212 K          |                    |

  

|                | Calculated                         | Reported               |
|----------------|------------------------------------|------------------------|
| Volume         | 4160(3)                            | 4160(3)                |
| Space group    | P 2/c                              | P 1 2/c 1              |
| Hall group     | -P 2yc                             | -P 2yc                 |
| Moiety formula | C33 H47 B Cl4 Cu N6 O2 [+ solvent] | C33 H47 B Cl4 Cu N6 O2 |
| Sum formula    | C33 H47 B Cl4 Cu N6 O2 [+ solvent] | C33 H47 B Cl4 Cu N6 O2 |
| Mr             | 775.93                             | 775.94                 |
| Dx,g cm-3      | 1.239                              | 1.239                  |
| Z              | 4                                  | 4                      |
| Mu (mm-1)      | 0.816                              | 0.816                  |
| F000           | 1620.0                             | 1620.0                 |
| F000'          | 1624.04                            |                        |
| h,k,lmax       | 20,17,27                           | 19,17,27               |
| Nref           | 9534                               | 9475                   |
| Tmin,Tmax      | 0.863,0.960                        | 1.000,1.000            |
| Tmin'          | 0.783                              |                        |

Correction method= # Reported T Limits: Tmin=1.000 Tmax=1.000

AbsCorr = REFDEL

Data completeness= 0.994      Theta(max)= 27.481

R(reflections)= 0.1099( 6857)      wR2(reflections)= 0.2762( 9475)

S = 1.110      Npar= 424

---

The following ALERTS were generated. Each ALERT has the format

**test-name\_ALERT\_alert-type\_alert-level.**

Click on the hyperlinks for more details of the test.

---

### Alert level A

PLAT482\_ALERT\_4\_A Small D-H...A Angle Rep for N21 ..N22 . 34.30 Degree

**Author Response: The angle of N21-H21\_\_\_N22 is 34.31 degree. However, in this case, this intramolecular interaction is negligible. This comes from the short distance (0.87 Å) of N21-H21 bond.**

---

### Alert level B

PLAT213\_ALERT\_2\_B Atom C11 has ADP max/min Ratio ..... 5.0 prolat

**Author Response: This alert is generated because there is a large amount of disorder in the structure.**

PLAT213\_ALERT\_2\_B Atom C28 has ADP max/min Ratio ..... 4.1 prolat

**Author Response: This alert is generated because there is a large amount of disorder in the structure.**

PLAT213\_ALERT\_2\_B Atom C29 has ADP max/min Ratio ..... 4.7 prolat

**Author Response: This alert is generated because there is a large amount of disorder in the structure.**

PLAT220\_ALERT\_2\_B NonSolvent Resd 1 C Ueq(max) / Ueq(min) Range 10.0 Ratio

**Author Response: This alert is generated because there is a large amount of disorder in the structure.**

PLAT242\_ALERT\_2\_B Low 'MainMol' Ueq as Compared to Neighbors of C13 Check

**Author Response: This alert is generated because there is a large amount of disorder in the structure.**

PLAT242\_ALERT\_2\_B Low 'MainMol' Ueq as Compared to Neighbors of C27 Check

**Author Response: This alert is generated because there is a large amount of disorder in the structure.**

PLAT356\_ALERT\_3\_B Short X-BH3 distance B1 - H1 . 0.99 Ang.

**Author Response: This alert is generated because there is a large amount of disorder in the structure.**

PLAT910\_ALERT\_3\_B Missing # of FCF Reflection(s) Below Theta(Min). 13 Note

**Author Response: Reduction of beam stop mask did not yield significant improvement. Most of those missing strong reflections appeared to be very strong and were treated as overflows. This is why it was old setting for the data collections.**

## ● Alert level C

PLAT082\_ALERT\_2\_C High R1 Value ..... 0.11 Report  
 PLAT084\_ALERT\_3\_C High wR2 Value (i.e. > 0.25) ..... 0.28 Report  
 PLAT213\_ALERT\_2\_C Atom C12 has ADP max/min Ratio ..... 3.8 prolat

**Author Response: This alert is generated because there is a large amount of disorder in the structure.**

PLAT222\_ALERT\_3\_C NonSolvent Resd 1 H Uiso(max)/Uiso(min) Range 9.4 Ratio  
 PLAT234\_ALERT\_4\_C Large Hirshfeld Difference C27 --C29 . 0.24 Ang.  
 PLAT242\_ALERT\_2\_C Low 'MainMol' Ueq as Compared to Neighbors of C17 Check

**Author Response: This alert is generated because there is a large amount of disorder in the structure.**

PLAT341\_ALERT\_3\_C Low Bond Precision on C-C Bonds ..... 0.012 Ang.  
 PLAT360\_ALERT\_2\_C Short C(sp3)-C(sp3) Bond C11 - C13 . 1.39 Ang.  
 PLAT482\_ALERT\_4\_C Small D-H...A Angle Rep for N21 ..N32 . 99.60 Degree

**Author Response: The angle of N21-H21...N22 is 34.31 degree. However, in this case, this intramolecular interaction is negligible. This comes from the short distance (0.87 Å) of N21-H21 bond.**

PLAT906\_ALERT\_3\_C Large K Value in the Analysis of Variance ..... 20.539 Check

### And 2 other PLAT906 Alerts

More ...

PLAT911\_ALERT\_3\_C Missing FCF Refl Between Thmin & STh/L= 0.600 41 Report  
 PLAT913\_ALERT\_3\_C Missing # of Very Strong Reflections in FCF .... 11 Note

## ● Alert level G

CHEMS02\_ALERT\_1\_G Please check that you have entered the correct  
 \_publ\_requested\_category classification of your compound;  
 FI or CI or EI for inorganic; FM or CM or EM for metal-organic;  
 FO or CO or EO for organic.



From the CIF: \_publ\_requested\_category CHOOSE FI FM FO CI CM CO or A

From the CIF: \_chemical\_formula\_sum : C33 H47 B1 Cl4 Cu1 N6 O2

|                   |                                                    |             |
|-------------------|----------------------------------------------------|-------------|
| PLAT007_ALERT_5_G | Number of Unrefined Donor-H Atoms .....            | 1 Report    |
| PLAT072_ALERT_2_G | SHELXL First Parameter in WGHT Unusually Large     | 0.11 Report |
| PLAT083_ALERT_2_G | SHELXL Second Parameter in WGHT Unusually Large    | 15.98 Why ? |
| PLAT606_ALERT_4_G | VERY LARGE Solvent Accessible VOID(S) in Structure | ! Info      |
| PLAT779_ALERT_4_G | Suspect or Irrelevant (Bond) Angle(s) in CIF . #   | 185 Check   |
|                   | N21 -H21 -N22 1.555 1.555 1.555 34.30 Deg.         |             |
| PLAT869_ALERT_4_G | ALERTS Related to the Use of SQUEEZE Suppressed    | ! Info      |
| PLAT912_ALERT_4_G | Missing # of FCF Reflections Above STh/L= 0.600    | 5 Note      |
| PLAT941_ALERT_3_G | Average HKL Measurement Multiplicity .....         | 1.0 Low     |
| PLAT978_ALERT_2_G | Number C-C Bonds with Positive Residual Density.   | 1 Info      |

---

1 **ALERT level A** = Most likely a serious problem - resolve or explain

8 **ALERT level B** = A potentially serious problem, consider carefully

14 **ALERT level C** = Check. Ensure it is not caused by an omission or oversight

10 **ALERT level G** = General information/check it is not something unexpected

1 ALERT type 1 CIF construction/syntax error, inconsistent or missing data

13 ALERT type 2 Indicator that the structure model may be wrong or deficient

11 ALERT type 3 Indicator that the structure quality may be low

7 ALERT type 4 Improvement, methodology, query or suggestion

1 ALERT type 5 Informative message, check

---



---

It is advisable to attempt to resolve as many as possible of the alerts in all categories. Often the minor alerts point to easily fixed oversights, errors and omissions in your CIF or refinement strategy, so attention to these fine details can be worthwhile. In order to resolve some of the more serious problems it may be necessary to carry out additional measurements or structure refinements. However, the purpose of your study may justify the reported deviations and the more serious of these should normally be commented upon in the discussion or experimental section of a paper or in the "special\_details" fields of the CIF. checkCIF was carefully designed to identify outliers and unusual parameters, but every test has its limitations and alerts that are not important in a particular case may appear. Conversely, the absence of alerts does not guarantee there are no aspects of the results needing attention. It is up to the individual to critically assess their own results and, if necessary, seek expert advice.

### Publication of your CIF in IUCr journals

A basic structural check has been run on your CIF. These basic checks will be run on all CIFs submitted for publication in IUCr journals (*Acta Crystallographica*, *Journal of Applied Crystallography*, *Journal of Synchrotron Radiation*); however, if you intend to submit to *Acta Crystallographica Section C* or *E* or *IUCrData*, you should make sure that **full publication checks** are run on the final version of your CIF prior to submission.

### Publication of your CIF in other journals

Please refer to the *Notes for Authors* of the relevant journal for any special instructions relating to CIF submission.

---

PLATON version of 22/04/2020; check.def file version of 09/03/2020

## Datablock L1'CuCatCl4 - ellipsoid plot

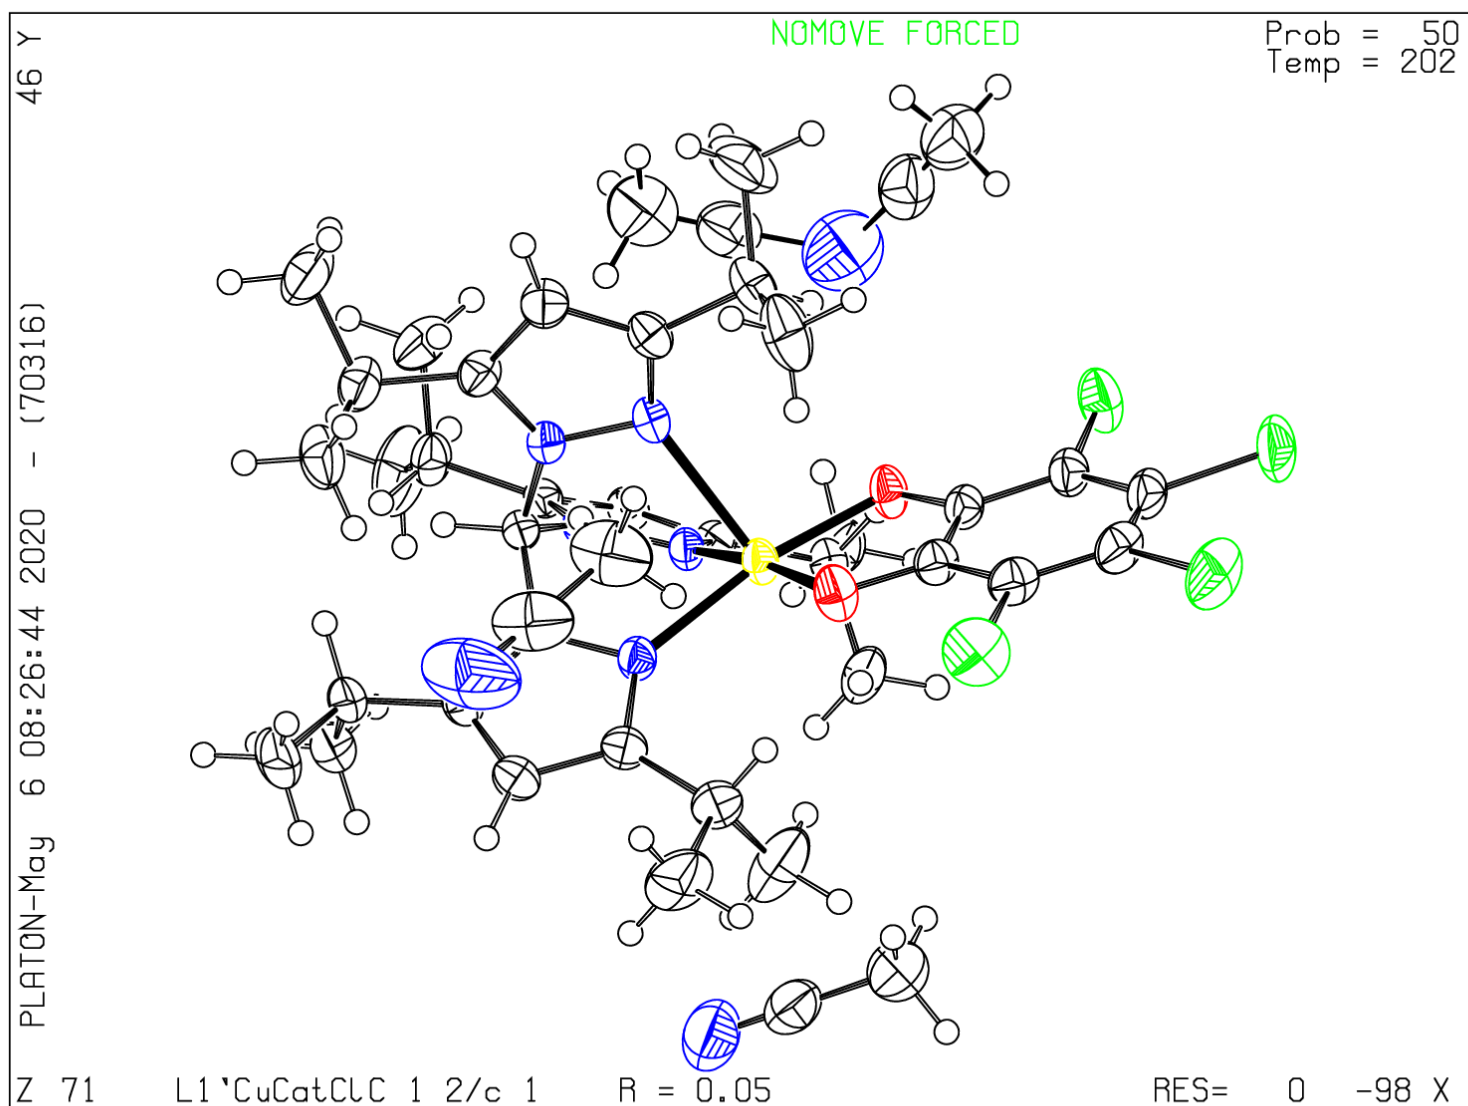

**Datablock L1'CuCatBr4** - ellipsoid plot

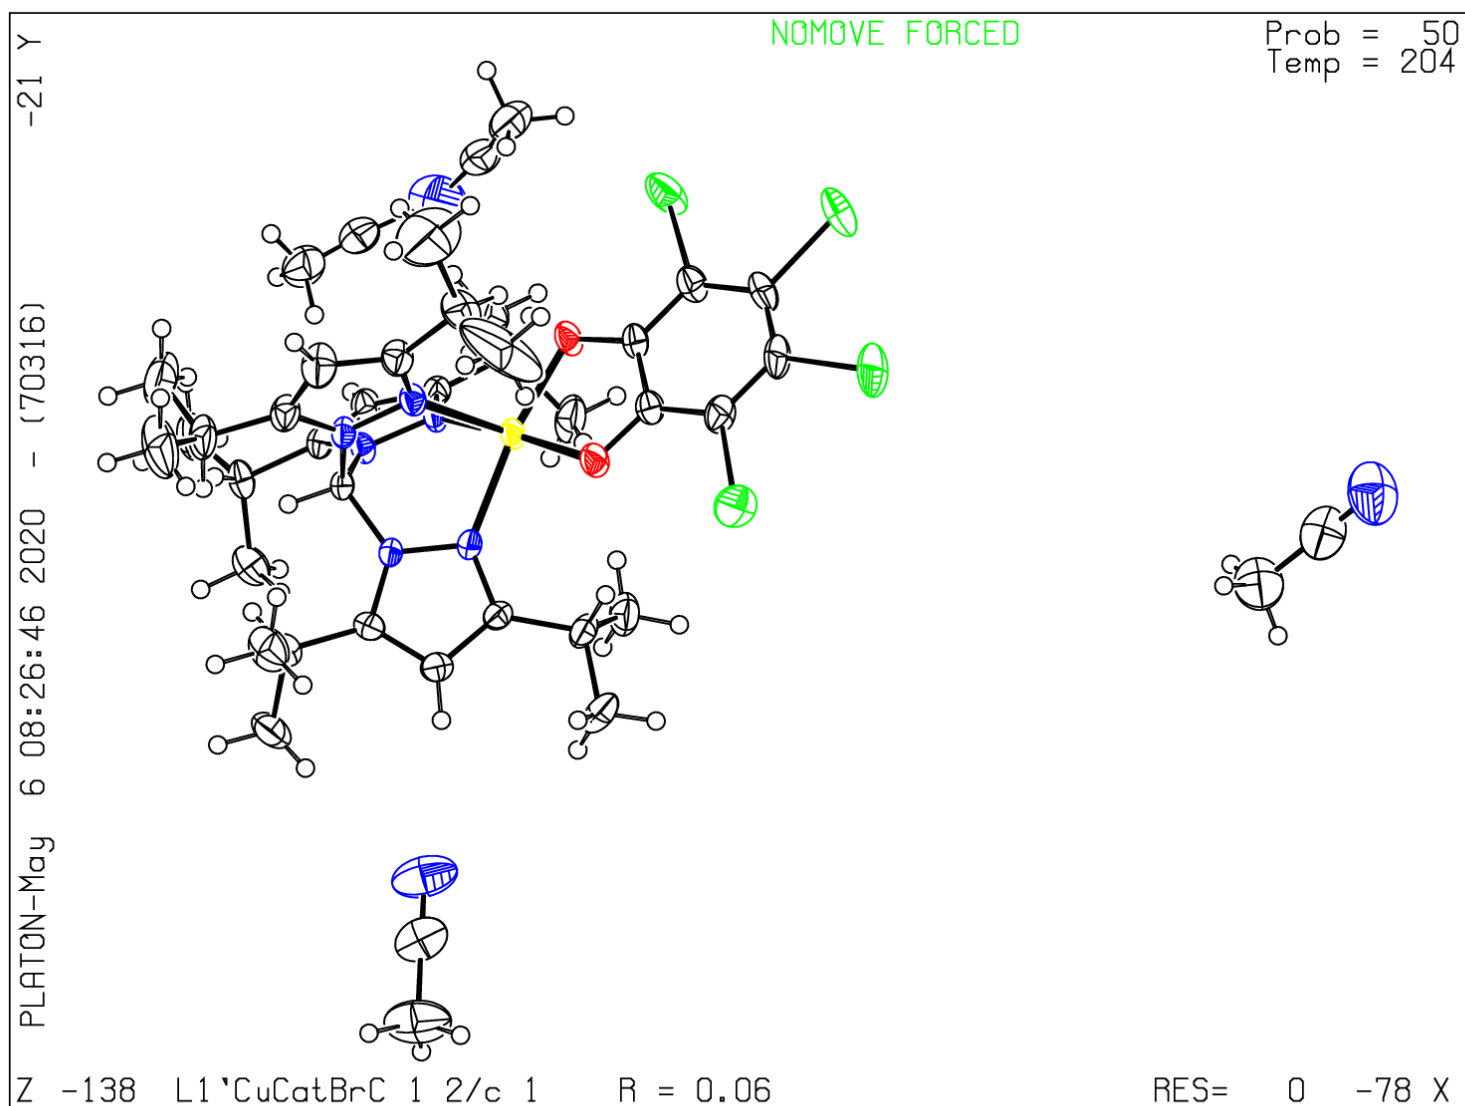

## Datablock L1HCuCatCl4 - ellipsoid plot

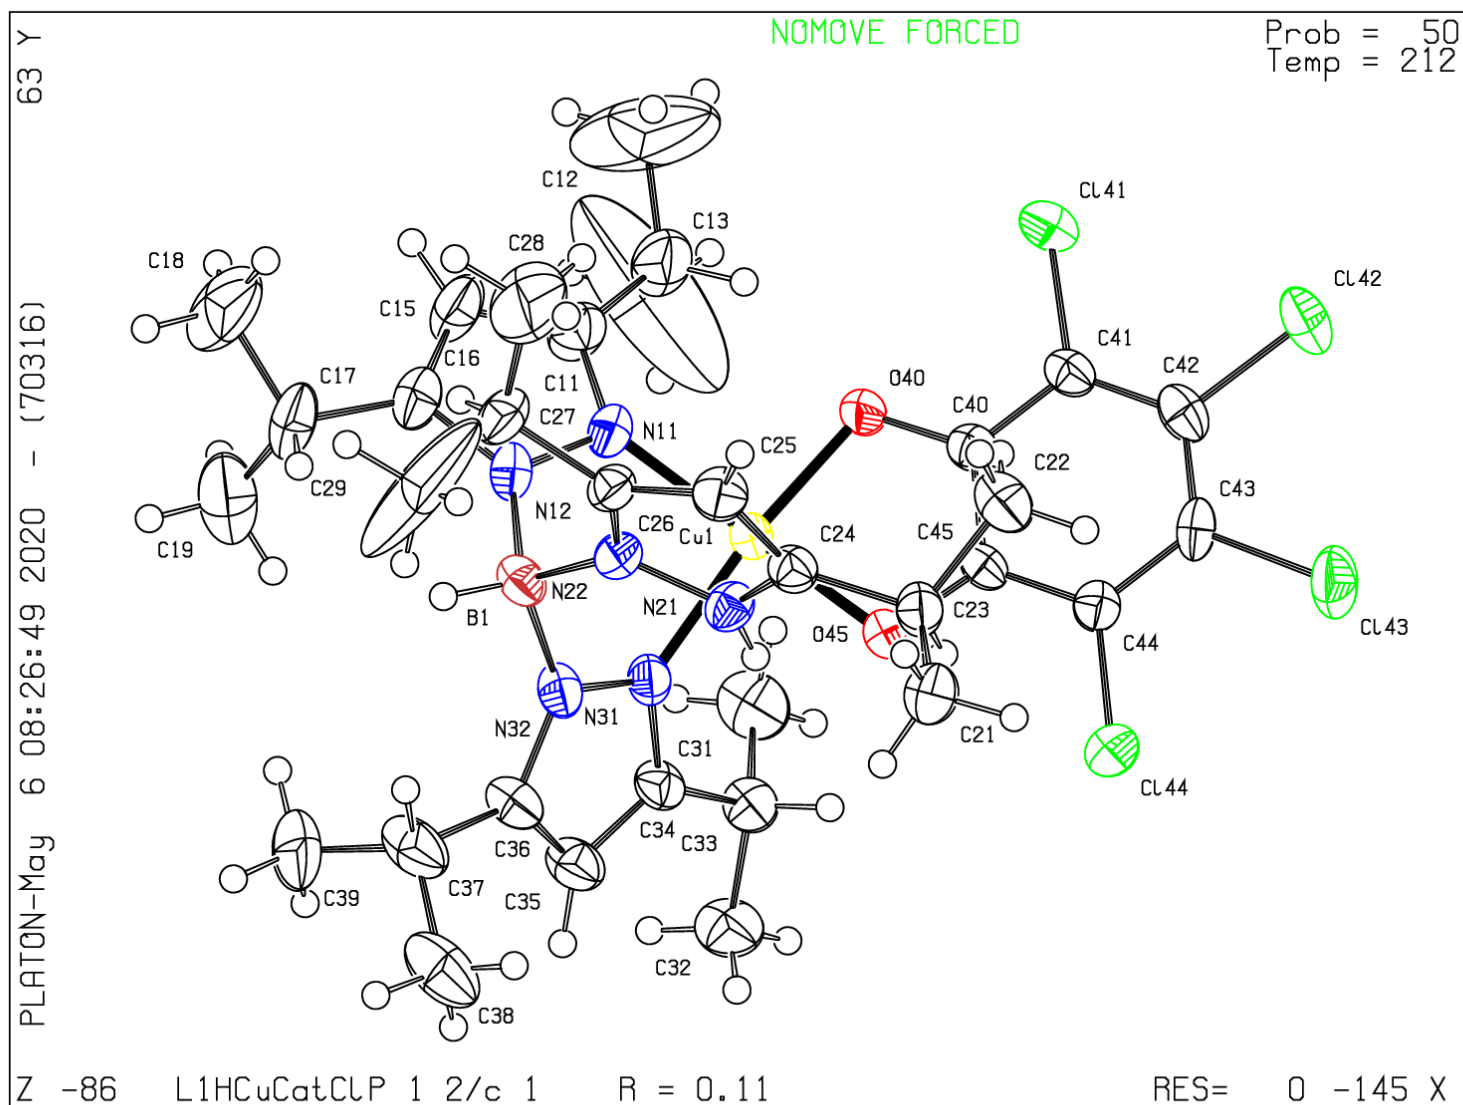

[Download CIF editor \(publCIF\) from the IUCr](#)  
[Download CIF editor \(enCIFer\) from the CCDC](#)  
[Test a new CIF entry](#)
